# Supplementary material
Source: publisher site journal article supplement (https://www.dovepress.com/article/254470)
Supplement: Supplementary file 1 [file get_supplementary_file.php]

**Supplemental Table 1**. Postoperative nausea and vomiting (PONV) (2-6h) among different CHRM3 rs2165870 genotype carriers.

|  | All genotypes | GG | GA | AA | *P*-value |
| --- | --- | --- | --- | --- | --- |
| n = 512 | n = 219 | n = 244 | n = 49 |
| Nausea (n; %) | 159 (31.1) | 64(29.2) | 70(28.7) | 25(51.0) | **0.006** |
| Retching/vomiting (n; %)  Nausea and retching/vomiting combined (PONV) (n; %) | 144 (28.1)  209 (40.8) | 61(27.9)  82(37.4) | 63(26.6)  96(39.3) | 20(36.7)  31(63.2) | 0.103  **0.003** |

Bold values are statistically significant (*P* <0.05)

**Supplemental Table 2**. Postoperative nausea and vomiting (PONV) (2-6h) among different types of surgeries.

|  | Casea | Controlb | *P*-value |
| --- | --- | --- | --- |
| n = 209 | n = 303 |
| Neurosurgery  Throat  Gynecological  General surgery | 61(46.6%)  45(36.9%)  47(35.1%)  56(44.8%) | 70(53.4%)  77(63.1%)  87(64.9%)  69(55.2%) | 0.156 |

Bold values are statistically significant (*P* <0.05)

aCases were PONV patients who had nausea and vomiting after surgery.

bControls were patients without nausea and vomiting after surgery.
